# Supplementary material
Source: publisher figshare collection journal article supplement (https://tandf.figshare.com/ndownloader/files/17889557)
Supplement: Supplementary file 1 [file 17889557]

Supplemental materials

A small-sized protein binder specific for human PD-1 effectively suppresses the tumor growth in tumor mouse model

Sumin Sona, Jinho Parka, Hyodeok Seoa,1, Hyun Tae Leeb, Yong-Seok Heob, and Hak-Sung Kima*

a Department of Biological Sciences, Korea Advanced Institute of Science and Technology (KAIST), Daejeon, Korea; b Department of Chemistry, Konkuk University, Seoul, Korea

1 Present address: Research Group of Natural Materials and Metabolism, Korea Food Research Institute (KFRI), Jeollabuk-do, Korea

* Tel: +82-42-350-2616, Fax: +82-42-350-2610, Email: e_hskim@kaist.ac.kr


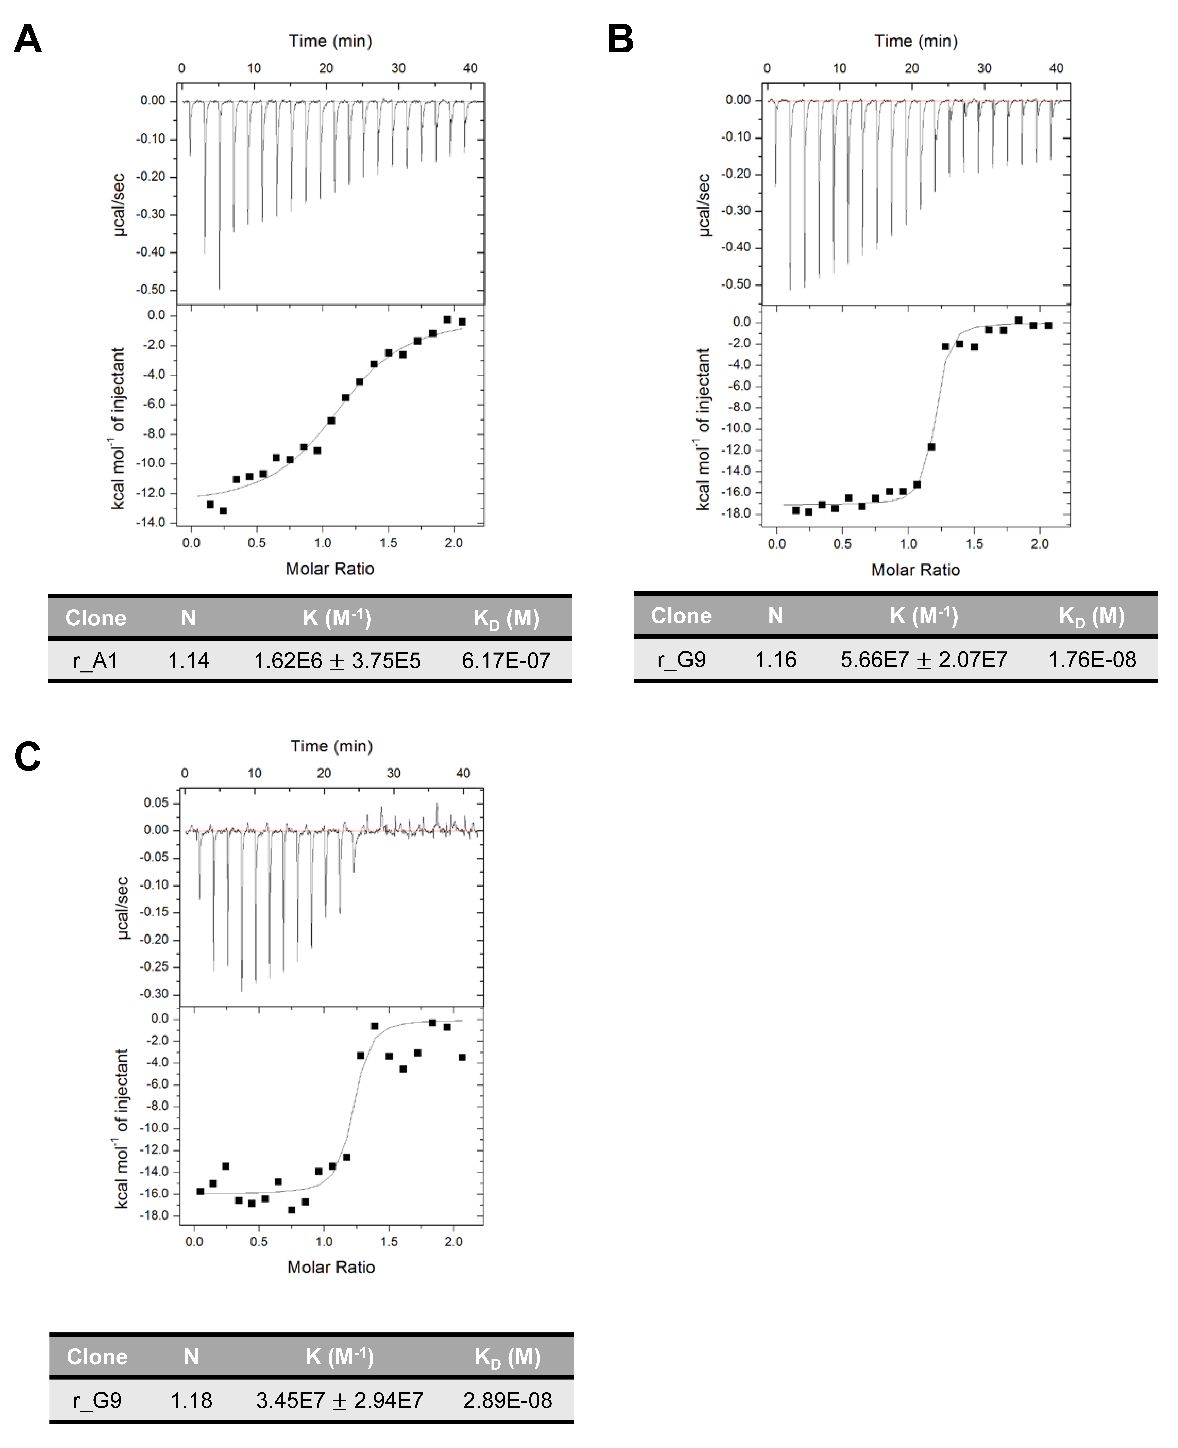


Figure S1. Binding affinity of selected repebodies for hPD-1 through ITC. Binding affinity of repebodies for hPD-1 was determined using a MicroCal iTC200 (Malvern, UK). 0.1 mM repebody was titrated with 0.01 mM hPD-1 at 25℃. Protein solution was injected 20 times with time interval of 120 s. The data were fitted and analyzed using the Origin program (OriginLab). (A) The binding affinity of r_A1 was estimated to be 617 nM. (B) r_G9 showed KD of 17.6 nM for hPD-1, which corresponds to a 35-fold increase compared to r_A1. (C) Extracellular domain of hPD-1 was expressed from *E.coli* to obtain non-glycosylated form. KD value of r_G9 for non-glycosylated hPD-1 was 28.9 nM.


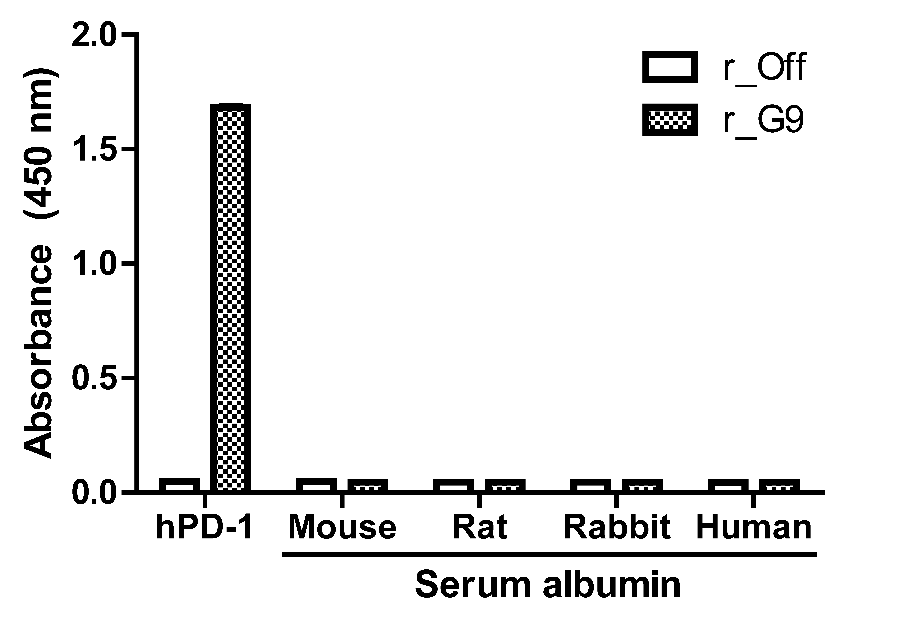


**Figure S2. Binding property of the selected repebody for serum albumins from difference species.** Binding activity of the repebody binds to a serum albumin was determined using ELISA. Albumins from mouse, rat, rabbit, and human serum were coated on a 96-well ELISA plate. hPD-1 was used as a positive control. Myc-tagged repebody (r_Off and r_G9) was added to a plate followed by washing, and signals were detected by HRP-conjugated anti-c-myc antibody (Santa Cruz Biotechnology). Data represent the means ± standard deviations (n = 3).


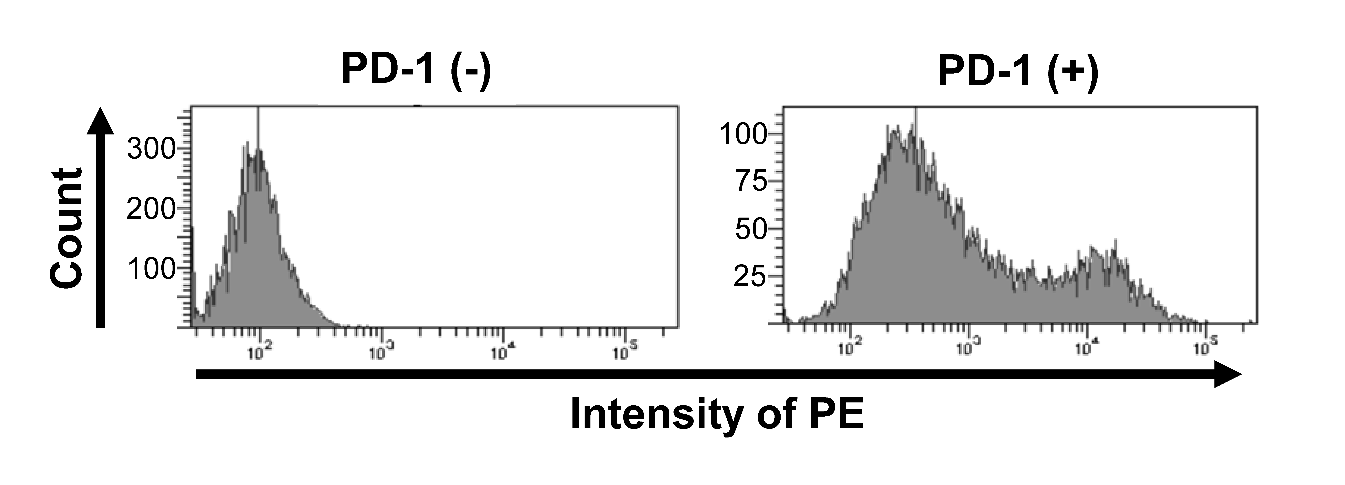


Figure S3. Construction of hPD-1-expressing CHO-K1 cells by transient transfection. 1 × 105 CHO-K1 cells were transfected with 3μg of hPD-1/pCMV3 plasmid DNA by lipofectamine transfection reagent. After incubation 48 hrs post transfection, cells were labeled with anti-hPD-1 antibody conjugated with PE (phycoerythrin) (R&D systems) and analyzed by flow cytometry. Transfection efficiency was estimated to be 65.6 %.


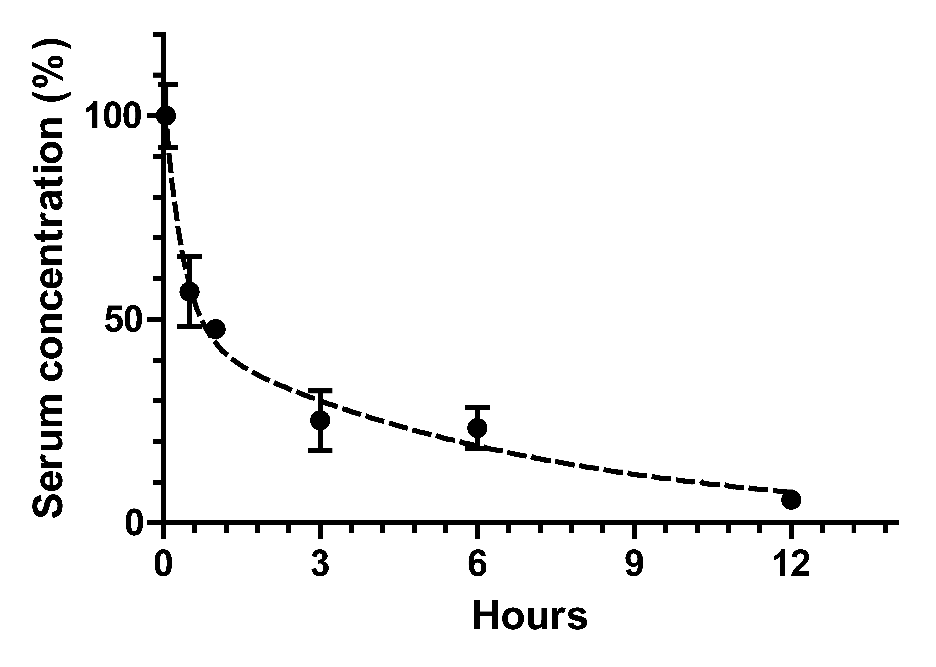


**Figure S4. Blood half-life of the repebody.** Male balb/c mice with 4-5 weeks of age were intravenously administered with the anti-hPD-1 repebody (r_G9) (10 mg/kg, 100 μL). Serum samples were obtained at time intervals, and serum concentration of the repebody was determined by sandwich ELISA. The initial and terminal half-lives of the repebody were determined using GraphPad Prism software. Data represent the mean standard deviation (n = 3).
